# Supplementary material for: A chemical bottom-up and successive top-down approach for nanoporous SnO2 hollows from Ni3Sn2 nanoalloys: high surface area photocatalysts and anode materials for lithium ion batteries
Source: Royal Society of Chemistry journal article supplement (doi:10.1039/c3ta11368j), 2013-01-01

*Electronic Supplementary Information for*

**Chemical Bottom-Up and Successive Top-Down Approach for Nanoporous SnO<sub>2</sub> Hollows from Ni<sub>3</sub>Sn<sub>2</sub> Nanoalloys: High Surface Area Photocatalysts and Anode Materials for Lithium Ion Batteries**

Jaewon Choi,<sup>a</sup> Seung Yong Han,<sup>a</sup> Jaewon Jin,<sup>a</sup> Jihyun Kim,<sup>a</sup> Ji Hoon Park,<sup>a</sup> Sang Moon Lee,<sup>b</sup> Hae Jin Kim,<sup>b</sup> and Seung Uk Son<sup>\*a</sup>

<sup>a</sup>Department of Chemistry and Department of Energy Science, Sungkyunkwan University, Suwon 440-746, Korea and <sup>b</sup>Korea Basic Science Institute, Daejeon 350-333, Korea

**Figure S1.** Photocatalytic studies of nanoporous SnO<sub>2</sub> hollow materials (20 mg) for the decomposition of RhB (red line), methylene blue (MB, blue line), and methyl orange (MO, orange line) under UV irradiation (2.0 mW/cm<sup>2</sup>) from an 120W Xe arc lamp. The 0.01 mM dye solutions (6 mL) were used.

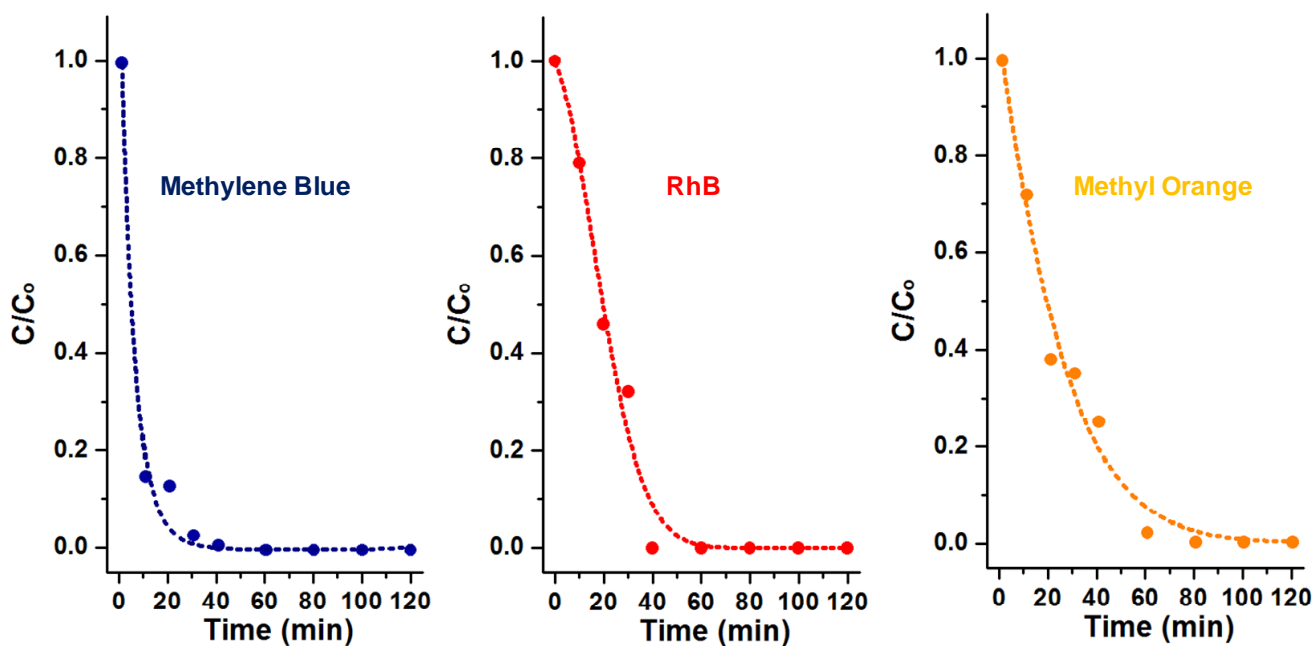

**Figure S2.** Photocatalytic studies of nanoporous SnO<sub>2</sub> hollow materials (20 mg, red line), TiO<sub>2</sub> nanopowder (20 mg, green line), and SnO<sub>2</sub> nanopowder (20 mg, dark blue line) for the decomposition of RhB under visible light irradiation (0.9 mW/cm<sup>2</sup>) from an 120W Xe arc lamp. The 0.01 mM dye solutions (6 mL) were used.

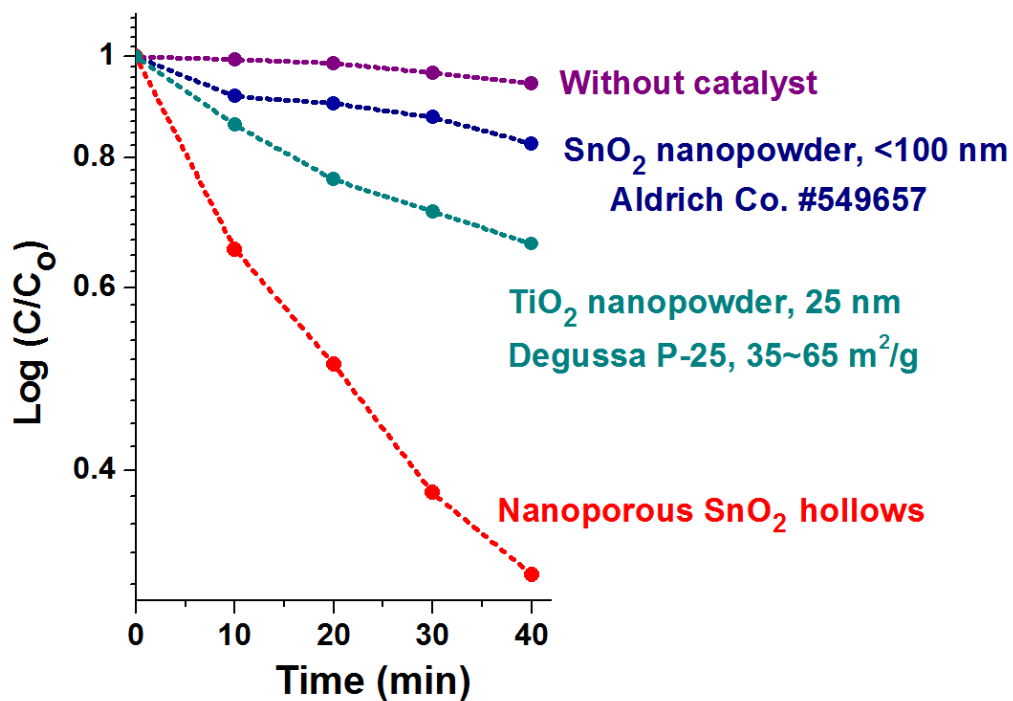

Supplement: c3ta11368j.pdf [file c3ta11368j.pdf]
